# Supplementary material
Source: HighWire-hosted journal article supplement (https://bmjopen.bmj.com/content/11/5/e043183)
Supplement: inline-supplementary-material-1 [file inline-supplementary-material-1.pdf]

# Table 1 The eMERGe meta-ethnography reporting guidance

From: [Improving reporting of meta-ethnography: the eMERGe reporting guidance](#)

Study: Calcia MA, Bedi S, Lempp H, Howard LM, Oram S. The healthcare experiences of perpetrators of domestic violence and abuse: a systematic review and meta-synthesis

| No.                                                    | Criteria Headings                              | Reporting Criteria                                                                                                                                               |
|--------------------------------------------------------|------------------------------------------------|------------------------------------------------------------------------------------------------------------------------------------------------------------------|
| Phase 1—Selecting meta-ethnography and getting started |                                                |                                                                                                                                                                  |
| <i>Introduction</i>                                    |                                                |                                                                                                                                                                  |
| 1                                                      | Rationale and context for the meta-ethnography | Describe the gap in research or knowledge to be filled by the meta-ethnography, and the wider context of the meta-ethnography<br><b>Introduction (pages 3-5)</b> |
| 2                                                      | Aim(s) of the meta-ethnography                 | Describe the meta-ethnography aim(s)<br><b>Introduction (page 5)</b>                                                                                             |
| 3                                                      | Focus of the meta-ethnography                  | Describe the meta-ethnography review question(s) (or objectives)<br><b>Introduction (page 5)</b>                                                                 |
| 4                                                      | Rationale for using meta-ethnography           | Explain why meta-ethnography was considered the most appropriate qualitative synthesis methodology<br><b>Methods – Data synthesis (pages 8-9)</b>                |
| Phase 2—Deciding what is relevant                      |                                                |                                                                                                                                                                  |
| <i>Methods</i>                                         |                                                |                                                                                                                                                                  |
| 5                                                      | Search strategy                                | Describe the rationale for the literature search strategy                                                                                                        |

| No.                                         | Criteria Headings                              | Reporting Criteria                                                                                                         |
|---------------------------------------------|------------------------------------------------|----------------------------------------------------------------------------------------------------------------------------|
|                                             |                                                | <b>Methods – Search strategy (page 6-7)</b>                                                                                |
| 6                                           | Search processes                               | Describe how the literature searching was carried out and by whom<br><b>Methods (pages 6-7)</b>                            |
| 7                                           | Selecting primary studies                      | Describe the process of study screening and selection, and who was involved<br><b>Methods – Selection process (page 8)</b> |
| <i>Findings</i>                             |                                                |                                                                                                                            |
| 8                                           | Outcome of study selection                     | Describe the results of study searches and screening<br><b>Results (pages 10-12)</b><br><b>PRISMA diagram (figure 1)</b>   |
| Phase 3—Reading included studies            |                                                |                                                                                                                            |
| <i>Methods</i>                              |                                                |                                                                                                                            |
| 9                                           | Reading and data extraction approach           | Describe the reading and data extraction method and processes<br><b>Methods (pages 8-9)</b>                                |
| <i>Findings</i>                             |                                                |                                                                                                                            |
| 10                                          | Presenting characteristics of included studies | Describe characteristics of the included studies<br><b>Results (pages 10-12)</b><br><b>Table 2 (page 11)</b>               |
| Phase 4—Determining how studies are related |                                                |                                                                                                                            |
| <i>Methods</i>                              |                                                |                                                                                                                            |

| No.                                          | Criteria Headings                               | Reporting Criteria                                                                                                                                                                                                                                                                                                                                                                                      |
|----------------------------------------------|-------------------------------------------------|---------------------------------------------------------------------------------------------------------------------------------------------------------------------------------------------------------------------------------------------------------------------------------------------------------------------------------------------------------------------------------------------------------|
| 11                                           | Process for determining how studies are related | Describe the methods and processes for determining how the included studies are related:<br>- Which aspects of studies were compared<br>AND<br>- How the studies were compared<br><br><b>Results (pages 11-21)</b>                                                                                                                                                                                      |
| <i>Findings</i>                              |                                                 |                                                                                                                                                                                                                                                                                                                                                                                                         |
| 12                                           | Outcome of relating studies                     | Describe how studies relate to each other<br><br><b>Results (pages 19-24)</b>                                                                                                                                                                                                                                                                                                                           |
| Phase 5—Translating studies into one another |                                                 |                                                                                                                                                                                                                                                                                                                                                                                                         |
| <i>Methods</i>                               |                                                 |                                                                                                                                                                                                                                                                                                                                                                                                         |
| 13                                           | Process of translating studies                  | Describe the methods of translation:<br>- Describe steps taken to preserve the context and meaning of the relationships between concepts within and across studies- Describe how the reciprocal and refutational translations were conducted- Describe how potential alternative interpretations or explanations were considered in the translations<br><br><b>Results and Discussion (pages 19-24)</b> |
| <i>Findings</i>                              |                                                 |                                                                                                                                                                                                                                                                                                                                                                                                         |
| 14                                           | Outcome of translation                          | Describe the interpretive findings of the translation.<br><br><b>Results and Discussion (pages 19-26)</b>                                                                                                                                                                                                                                                                                               |
| Phase 6—Synthesizing translations            |                                                 |                                                                                                                                                                                                                                                                                                                                                                                                         |
| <i>Methods</i>                               |                                                 |                                                                                                                                                                                                                                                                                                                                                                                                         |
| 15                                           | Synthesis process                               | Describe the methods used to develop overarching concepts (“synthesised translations”)<br>Describe how potential alternative interpretations or explanations were considered in the synthesis<br><br><b>Results (page 11) and Discussion (pages 19-26)</b>                                                                                                                                              |

| No.                              | Criteria Headings                       | Reporting Criteria                                                                                                                                                                                                                                                                                                                                                                                                                                      |
|----------------------------------|-----------------------------------------|---------------------------------------------------------------------------------------------------------------------------------------------------------------------------------------------------------------------------------------------------------------------------------------------------------------------------------------------------------------------------------------------------------------------------------------------------------|
| <i>Findings</i>                  |                                         |                                                                                                                                                                                                                                                                                                                                                                                                                                                         |
| 16                               | Outcome of synthesis process            | Describe the new theory, conceptual framework, model, configuration, or interpretation of data developed from the synthesis<br><b>Results (third-order constructs) and Discussion (pages 19-26)</b>                                                                                                                                                                                                                                                     |
| Phase 7—Expressing the synthesis |                                         |                                                                                                                                                                                                                                                                                                                                                                                                                                                         |
| <i>Discussion</i>                |                                         |                                                                                                                                                                                                                                                                                                                                                                                                                                                         |
| 17                               | Summary of findings                     | Summarize the main interpretive findings of the translation and synthesis and compare them to existing literature<br><b>Discussion (pages 25-29)</b>                                                                                                                                                                                                                                                                                                    |
| 18                               | Strengths, limitations, and reflexivity | Reflect on and describe the strengths and limitations of the synthesis:<br>- Methodological aspects—for example, describe how the synthesis findings were influenced by the nature of the included studies and how the meta-ethnography was conducted.- Reflexivity—for example, the impact of the research team on the synthesis findings<br><b>Discussion, sub-section Strengths and Limitations (pages 27-28)</b><br><b>Reflexivity (pages 9-10)</b> |
| 19                               | Recommendations and conclusions         | Describe the implications of the synthesis<br><b>Discussion (pages 25-29) and Conclusion (page 29)</b>                                                                                                                                                                                                                                                                                                                                                  |
